# Supplementary material for: Zika virus causes placental pyroptosis and associated adverse fetal outcomes by activating GSDME
Source: eLife journal article supplement (doi:10.7554/elife.73792), 2022-07-27
Supplement: fig1-data1 [file Fig 1B.xlsx]

## Sheet: Sheet1
LDH		Mock			ZIKV
	12h	1.57	1.8	1.53	1.83	1.4	2.01
	24h	1.86	1.79	2.22	48.91	44.81	38.9
	36h	0.31	1.87	4.47	48.9	85.53	85.07
ATP		Mock			ZIKV
	12h	101.88	99.97	99.85	99.34	99.94	99.95
	24h	99.93	99.76	94.31	45.78	48.65	38.75
	36h	100.94	99.5	93.56	17.38	26.35	21.7
