# Supplementary material for: Zika virus causes placental pyroptosis and associated adverse fetal outcomes by activating GSDME
Source: eLife journal article supplement (doi:10.7554/elife.73792), 2022-07-27
Supplement: fig1-data1 [file Fig 1F.xlsx]

## Sheet: Sheet1
			Mock			ZIKV
	LDH	WT	2.74	0.79	0.43	45.39	50.87	42.65
		GSDME-KO	0.91	0.77	1.26	7.08	8.13	7.78
			Mock			ZIKV
	ATP	WT	99.05	100.67	99.87	55.75	49.88	48.21
		GSDME-KO	99.12	98.67	101.41	83.68	86.75	88.7
