# Supplementary material for: Zika virus causes placental pyroptosis and associated adverse fetal outcomes by activating GSDME
Source: eLife journal article supplement (doi:10.7554/elife.73792), 2022-07-27
Supplement: fig2-data1 [file Fig 2B.xlsx]

## Sheet: Sheet1
		HeLa							293T							HUH7							A549							SHSY5Y
LDH		Control			ZIKV				Control			ZIKV				Control			ZIKV				Control			ZIKV				Control			ZIKV
	24h	1.32	1.45	0.94	1.54	1.23	1.11	24h	1.13	1.41	1.15	1.12	1.23	1.42	24h	1.14	1.35	1.98	1.87	1.54	1.12	24h	1.21	2	2.42	1.43	1.11	1.42	24h	1.34	1.11	1.32	1.12	1.61	1.12
	48h	1.45	1.23	1.11	1.32	1.22	0.13	48h	3.13	2.98	2.34	1.99	2.72	3.41	48h	3.42	4.12	2.14	5.14	4.13	2.42	48h	1.35	2.13	1.51	18.56	17.17	22.12	48h	1.81	1.93	2.33	1.9	2.1	1.74
	72h	4.15	2.12	3.23	3.41	4.23	3.12	72h	8.65	7.61	7.12	7.24	6.98	7.45	72h	6.23	6.13	6.55	21.23	17.16	18.13	72h	3	2.32	2.65	39.23	30.12	43.13	72h	2.43	2.7	4.51	3.42	4.11	2.61
ATP		Control			ZIKV				Control			ZIKV				Control			ZIKV				Control			ZIKV				Control			ZIKV
	24h	98.76	99.34	99.45	98.55	99.67	99.54	24h	99.01	99.32	97.89	98.67	99.98	100.02	24h	98.98	99.52	97.99	97.78	99.09	99.34	24h	98.13	99.46	99.72	98.99	99.35	97.95	24h	99.82	98.64	99.12	97.81	98.94	99.31
	48h	97.87	98.35	98.89	97.78	98.34	97.45	48h	97.67	98.67	97.67	97.67	98.57	96.74	48h	96.79	97.89	99.16	96.79	98	99.98	48h	97.85	96.68	98.76	78.14	70.62	65.75	48h	98.64	97.64	96.71	97.57	97.88	96.91
	72h	96.67	96.67	94.56	95.76	96.87	95.23	72h	91.32	92.31	90.12	89.92	90.24	91.32	72h	97.68	95.67	90.56	67.68	70.78	75.57	72h	96.91	97.82	97.79	51.34	44.13	49.25	72h	97.57	96.75	95.63	96.79	98.46	95.11
