# Supplementary material for: Zika virus causes placental pyroptosis and associated adverse fetal outcomes by activating GSDME
Source: eLife journal article supplement (doi:10.7554/elife.73792), 2022-07-27
Supplement: fig2-data1 [file Fig 2E.xlsx]

## Sheet: Sheet1
			MOI
		Mock	0.1	0.5	1	2	5
		3.41	6.03	18.52	37.93	57.63	77.68
	LDH	2.91	5.13	21.86	34.88	53.81	70.56
		5.2	4.92	15.27	42.31	48.18	80.55
		Mock	0.1	0.5	1	2	5
		96.5281	80.35	60.87	45.21	32.52	22.88
	ATP	99.4239	89.16	67.82	51.4	32.96	23.94
		99.95	89.15	58.48	44.49	34.61	24.35
