# Supplementary material for: Zika virus causes placental pyroptosis and associated adverse fetal outcomes by activating GSDME
Source: eLife journal article supplement (doi:10.7554/elife.73792), 2022-07-27
Supplement: fig3-data1 [file Fig 3B.xlsx]

## Sheet: Sheet1
		Control	DMSO	ZIKV	DMSO+ZIKV	VX765+ZIKV	DEVD+ZIKV	VAD+ZIKV	GSK872+ZIKV
		3.84	4.77	43.79	43.09	44.01	31.13	26.32	42.62
	LDH	4.51	8.55	44.01	42.62	44.71	30.2	23.42	42.16
		5.53	5.14	42.13	44.11	45.94	31.76	25.18	44.58
		Control	DMSO	ZIKV	DMSO+ZIKV	VX-765+ZIKV	Z-DEVD-FMK+ZIKV	Z-VAD-FMK+ZIKV	GSK872+ZIKV
		96.3	99.65	49.64	46.2	45.3	58.21	73.06	47.25
	ATP	100.6	94.12	47.99	44.13	41.33	60.94	70.51	47.23
		99.09	96.85	46.65	45.19	42.26	62.05	70.71	40.66
