# Supplementary material for: Zika virus causes placental pyroptosis and associated adverse fetal outcomes by activating GSDME
Source: eLife journal article supplement (doi:10.7554/elife.73792), 2022-07-27
Supplement: fig3-data1 [file Fig 3E.xlsx]

## Sheet: Sheet1
		Control	ZIKV	DMSO	DMSO+ZIKV	Z-IETD-FMK+ZIKV	Z-LEHD-FMK+ZIKV
		5.89	58.18	5.06	52.84	10.33	49.51
	LDH	3.61	45.28	2.57	46.12	10.4	32.8
		4.51	49.24	2.36	43.62	11.23	34.95
		Control	ZIKV	DMSO	DMSO+ZIKV	Z-IETD-FMK+ZIKV	Z-LEHD-FMK+ZIKV
		99.62	39.62	92.48	42.47	68.58	42.33
	ATP	99.01	46.9	98.04	43.63	75.1	47.78
		99.18	43.26	98.33	42.52	79.14	46.76
