# Supplementary material for: Zika virus causes placental pyroptosis and associated adverse fetal outcomes by activating GSDME
Source: eLife journal article supplement (doi:10.7554/elife.73792), 2022-07-27
Supplement: fig3-data1 [file Fig 3G.xlsx]

## Sheet: Sheet1
	LDH						ATP
	Mock			ZIKV			Mock			ZIKV
WT	3.46	4.22	2.15	55.63	52.14	48.47	97.62	95.48	98.33	40.27	38.19	35.46
CASP1-KO	3.27	5.14	2.09	45.57	47.31	51.96	96.26	96.31	97.38	40.36	42.37	36.15
CASP3-KO	4.53	3.3	5.17	6.55	4.26	5.14	96.85	98.24	96.47	80.29	85.13	77.63
CASP8-KO	3.25	3.19	2.76	19.16	20.27	18.31	96.24	96.08	97.33	60.32	62.91	70.29
