# Supplementary material for: Zika virus causes placental pyroptosis and associated adverse fetal outcomes by activating GSDME
Source: eLife journal article supplement (doi:10.7554/elife.73792), 2022-07-27
Supplement: fig3-data1 [file Fig 3I.xlsx]

## Sheet: Sheet1
Mock	ZIKV
1.91	86.46
1.08	93.2
0.97	106.12
