# Supplementary material for: Zika virus causes placental pyroptosis and associated adverse fetal outcomes by activating GSDME
Source: eLife journal article supplement (doi:10.7554/elife.73792), 2022-07-27
Supplement: fig3-data1 [file Fig 3J.xlsx]

## Sheet: Sheet1
Mock	ZIKV
7.25	18.65
11.19	20.13
8.08	16.22
