# Supplementary material for: Zika virus causes placental pyroptosis and associated adverse fetal outcomes by activating GSDME
Source: eLife journal article supplement (doi:10.7554/elife.73792), 2022-07-27
Supplement: fig3-data1 [file Fig 3K.xlsx]

## Sheet: Sheet1
	Mock	ZIKV	DMSO	DMSO+ZIKV	R-7050+ZIKV
LDH	5.18	49.87	2.3	48.36	6.25
	3.31	42.31	5.35	44.57	5.24
	3.69	45.98	4.97	42.89	8.85
	Mock	ZIKV	DMSO	DMSO+ZIKV	R-7050+ZIKV
ATP	92.75	40.33	98.33	45.05	88.65
	96.98	43.16	96.85	43.21	85.36
	95.36	41.57	96.67	44.39	90.21
