# Supplementary material for: Zika virus causes placental pyroptosis and associated adverse fetal outcomes by activating GSDME
Source: eLife journal article supplement (doi:10.7554/elife.73792), 2022-07-27
Supplement: fig3-figsupp1-data1 [file 1b.xlsx]

## Sheet: Sheet1
Mock	DMSO	ZIKV	DMSO+ZIKV	VX765+ZIKV	DEVD+ZIKV	VAD+ZIKV	GSK872+ZIKV
0.07	0.03	1.51	1.1	0.87	0.57	0.2	0.69
0.05	0.05	1.12	1.33	1.12	0.65	0.19	1.25
0.04	0.04	1.01	1.42	1.31	0.52	0.25	1.02
