# Supplementary material for: Zika virus causes placental pyroptosis and associated adverse fetal outcomes by activating GSDME
Source: eLife journal article supplement (doi:10.7554/elife.73792), 2022-07-27
Supplement: fig3-figsupp1-data1 [file 1d.xlsx]

## Sheet: Sheet1
Mock	ZIKV	DMSO	DMSO+ZIKV	Z-IETD-FMK+ZIKV	Z-LEHD-FMK+ZIKV
0.15	1.26	0.32	0.93	0.55	0.76
0.1	1.52	0.16	1.26	0.46	0.9
0.09	1.25	0.14	1.32	0.62	0.99
