# Supplementary material for: Zika virus causes placental pyroptosis and associated adverse fetal outcomes by activating GSDME
Source: eLife journal article supplement (doi:10.7554/elife.73792), 2022-07-27
Supplement: fig3-figsupp1-data1 [file 1e.xlsx]

## Sheet: Sheet1
	Mock			ZIKV
WT	0.18	0.22	0.25	1.24	1.43	1.52
CASP1-KO	0.3	0.21	0.15	1.53	1.32	1.24
CASP3-KO	0.26	0.18	0.11	0.15	0.27	0.3
CASP8-KO	0.21	0.22	0.16	0.46	0.59	0.53
