# Supplementary material for: Zika virus causes placental pyroptosis and associated adverse fetal outcomes by activating GSDME
Source: eLife journal article supplement (doi:10.7554/elife.73792), 2022-07-27
Supplement: fig3-figsupp1-data1 [file 1f.xlsx]

## Sheet: Sheet1
Mock	ZIKV	DMSO	DMSO+ZIKV	R-7050+ZIKV
0.17	1.01	0.1	0.89	0.27
0.21	1.13	0.15	1.21	0.13
0.12	0.95	0.14	1.03	0.22
