# Supplementary material for: Zika virus causes placental pyroptosis and associated adverse fetal outcomes by activating GSDME
Source: eLife journal article supplement (doi:10.7554/elife.73792), 2022-07-27
Supplement: fig4-data1 [file Fig 4B.xlsx]

## Sheet: Sheet1
	Control	Lipofectamine 2000	5' UTR	3' UTR
LDH	3.42231	4.13252	32.4189	15.7795
	4.12125	1.47485	36.1273	18.5518
	2.14642	3.15372	29.5327	19.5416
	Control	Lipofectamine 2000	5' UTR	3' UTR
ATP	96.4213	99.1322	32.4113	65.7126
	99.4574	96.6717	44.5612	68.9124
	97.7867	95.7871	40.0921	70.5661
