# Supplementary material for: Zika virus causes placental pyroptosis and associated adverse fetal outcomes by activating GSDME
Source: eLife journal article supplement (doi:10.7554/elife.73792), 2022-07-27
Supplement: fig4-data1 [file Fig 4E.xlsx]

## Sheet: Sheet1
			Mock			ZIKV
		WT	2.35	3.41	2.43	38.75	42.53	36.18
	LDH	RIG-I-KD	2.61	1.89	1.35	9.31	13.59	14.27
		TLR-7-KD	2.01	1.59	3.25	35.96	40.28	33.76
		TLR-8-KD	1.58	2.03	1.79	41.52	38.54	35.09
			Mock			ZIKV
		WT	98.21	96.79	97.03	50.12	48.35	54.37
	ATP	RIG-I-KD	99.23	96.54	95.47	85.34	80.29	79.38
		TLR-7-KD	97.83	96.35	97.24	45.69	51.27	48.85
		TLR-8-KD	96.78	96.95	98.12	44.31	46.23	50.34
