# Supplementary material for: Zika virus causes placental pyroptosis and associated adverse fetal outcomes by activating GSDME
Source: eLife journal article supplement (doi:10.7554/elife.73792), 2022-07-27
Supplement: fig4-data1 [file Fig 4G.xlsx]

## Sheet: Sheet1
			Mock			ZIKV
		WT	1.59	1.68	1.13	45.17	40.36	46.29
	LDH	RIG-I-KO	2.03	1.69	2.45	10.68	13.42	18.13
		MDA5-KO	0.78	1.75	1.21	35.19	30.82	38.57
		MAVS-KO	2.17	1.59	0.88	32.03	34.78	37.92
			Mock			ZIKV
		WT	96.34	95.08	96.66	50.04	45.26	43.76
	ATP	RIG-I-KO	95.4	92.67	96.45	78.42	72.35	70.81
		MDA5-KO	95.78	94.63	97.21	50.73	48.22	53.84
		MAVS-KO	95.61	97.27	94.2365	56.23	50.01	48.37
