# Supplementary material for: Zika virus causes placental pyroptosis and associated adverse fetal outcomes by activating GSDME
Source: eLife journal article supplement (doi:10.7554/elife.73792), 2022-07-27
Supplement: fig4-data1 [file Fig 4I.xlsx]

## Sheet: Sheet1
		Control			5' UTR
LDH	WT	1.95	1.12	1.54	35.89	45.26	44.36
	RIG-I-KO	1.02	1.33	0.96	3.53	4.19	2.98
ATP	WT	98.25	99.48	96.89	44.68	52.32	55.26
	RIG-I-KO	99.3	98.45	97.67	95.21	90.58	96.11
