# Supplementary material for: Zika virus causes placental pyroptosis and associated adverse fetal outcomes by activating GSDME
Source: eLife journal article supplement (doi:10.7554/elife.73792), 2022-07-27
Supplement: fig4-data1 [file Fig 4K.xlsx]

## Sheet: Sheet1
	Mock			ZIKV
WT	0.98	0.99	1.03	91.83	106.94	83.56
RIG-I-KO	1.51	1.4	0.96	8.37	13.45	8.74
