# Supplementary material for: Zika virus causes placental pyroptosis and associated adverse fetal outcomes by activating GSDME
Source: eLife journal article supplement (doi:10.7554/elife.73792), 2022-07-27
Supplement: fig4-data1 [file Fig 4L.xlsx]

## Sheet: Sheet1
	Mock			ZIKV
WT	11.94	14.32	9.95	23.46	23.07	24.65
RIG-I-KO	12.01	11.18	13.53	12.34	10.41	13.92
