# Supplementary material for: Zika virus causes placental pyroptosis and associated adverse fetal outcomes by activating GSDME
Source: eLife journal article supplement (doi:10.7554/elife.73792), 2022-07-27
Supplement: fig4-figsupp1-data1 [file 1b.xlsx]

## Sheet: Sheet1
		Mock	ZIKV	UV-ZIKV
	LDH	1.21	43.27	1.21
		0.07	52.13	2.02
		1.26	44.45	0.9
		Mock	ZIKV	UV-ZIKV
	ATP	99.85	50.33	98.46
		97.57	42.54	97.6
		95.63	40.32	95.57
