# Supplementary material for: Zika virus causes placental pyroptosis and associated adverse fetal outcomes by activating GSDME
Source: eLife journal article supplement (doi:10.7554/elife.73792), 2022-07-27
Supplement: fig4-figsupp1-data1 [file 1d.xlsx]

## Sheet: Sheet1
	Control	ZIKV	NS1	NS2A	NS2B3P	NS3H	NS4A	NS4B	NS5
LDH	0.12	50.32	1.21	0.32	1.11	0.57	0.37	0.66	0.85
	1.21	45.33	0.25	0.36	1.04	1.25	0.35	0.85	1.32
	0.56	51.23	1.21	1.24	0.6	0.86	1.24	1.22	1.03
	Control	ZIKV	NS1	NS2A	NS2B3P	NS3H	NS4A	NS4B	NS5
ATP	99.85	42.21	96.56	96.57	98.23	96.56	98.23	99.12	93.22
	97.66	38.57	98.54	97.21	95.68	98.24	91.25	95.23	97.56
	96.65	35.65	97.57	99.24	96.46	96.25	97.24	97.37	96.35
