# Supplementary material for: Zika virus causes placental pyroptosis and associated adverse fetal outcomes by activating GSDME
Source: eLife journal article supplement (doi:10.7554/elife.73792), 2022-07-27
Supplement: fig4-figsupp2-data1 [file 2b.xlsx]

## Sheet: Sheet1
	Control	Lipo2000	poly(I:C)	hRIG-IN
LDH	1.13	1.25	43.96	33.32
	0.95	1.39	38.73	45.21
	1.4	1.51	48.62	39.75
ATP	97.56	95.54	43.99	49.28
	96.37	94.29	48.37	51.31
	99.21	96.75	40.68	40.27
