# Supplementary material for: Zika virus causes placental pyroptosis and associated adverse fetal outcomes by activating GSDME
Source: eLife journal article supplement (doi:10.7554/elife.73792), 2022-07-27
Supplement: fig4-figsupp2-data1 [file 2d.xlsx]

## Sheet: Sheet1
	5'utr	-	+	-	+
	IFNAR1 antibody	-	-	+	+
	,LDH	0.89	45.12	1.34	44.53
		1.02	42.34	0.98	39.74
		1.24	40.96	1.16	41.46
	ATP	97.56	40.23	95.47	38.94
		96.22	38.64	97.3	42.37
		97.34	39.48	96.62	37.26
