# Supplementary material for: Zika virus causes placental pyroptosis and associated adverse fetal outcomes by activating GSDME
Source: eLife journal article supplement (doi:10.7554/elife.73792), 2022-07-27
Supplement: fig5-data1 [file Fig 5F.xlsx]

## Sheet: Sheet1
WT Mock	WT ZIKV	Gsdme-/- Mock	Gsdme-/- ZIKV
0	20.13	1.21	8.43
1.53	15.64	0	7.32
0.1	13.72	1.58	5.16
			50
