# Supplementary material for: Zika virus causes placental pyroptosis and associated adverse fetal outcomes by activating GSDME
Source: eLife journal article supplement (doi:10.7554/elife.73792), 2022-07-27
Supplement: fig5-data1 [file Fig 5G.xlsx]

## Sheet: Sheet1
		spleen			brain			serum
		WT	Gsdme-/-		WT	Gsdme-/-		WT	Gsdme-/-
		1523	1521		undetactable	undetactable		undetactable	undetactable
		2145	3254
		923	1762
		1485	1523
		2631	2545
		3571	2236
		1458	3215
		2115	1203
		1423	1825
		4251	345
		3252	95
		6520	689
		2133
		567
