# Supplementary material for: Zika virus causes placental pyroptosis and associated adverse fetal outcomes by activating GSDME
Source: eLife journal article supplement (doi:10.7554/elife.73792), 2022-07-27
Supplement: fig5-data1 [file Fig 5H.xlsx]

## Sheet: Sheet1
		placenta			fetal brain
		WT	Gsdme-/-		WT	Gsdme-/-
		5932	2156		2645	3693
		16266	236587		154	352
		2868	654785		342	852
		854	31575		634	653
		855	54132		3562	758
		389759	2451			364
		3742	1256
		914628	759
		3812	4521
		108128	756
		3199	32145
		5880	15426
		899	16235
		4683	18547
		2831	25623
		15321	5142
		34653	1574
		1231	9523
		978	45624
		55754	236578
		154346	56248
		865	4521
		855	1236
		58068
		2470
		169518
		26668
		313295
		60921
		50
		No ZIKV RNA were detected in the the rest of samples
		50
		50
		50
		50
		50
		50
		50
		50
		50
		50
			50
