# Supplementary material for: Zika virus causes placental pyroptosis and associated adverse fetal outcomes by activating GSDME
Source: eLife journal article supplement (doi:10.7554/elife.73792), 2022-07-27
Supplement: fig5-figsupp1-data1 [file 1b.xlsx]

## Sheet: Sheet1
	DMSO	DMSO+ZIKV	Z-DEVD-FMK+ZIKV	Z-IETD-FMK+ZIKV
LDH	2.85	28.65	10.33	18.65
	4.27	35.24	12.15	15.14
	5.12	24.98	9.22	14.96
ATP	95.25	65.27	82.23	72.64
	95.37	60.22	84.36	75.29
	98.26	64.87	80.97	69.87
