# Supplementary material for: Zika virus causes placental pyroptosis and associated adverse fetal outcomes by activating GSDME
Source: eLife journal article supplement (doi:10.7554/elife.73792), 2022-07-27
Supplement: fig6-data1 [file Fig 6A.xlsx]

## Sheet: Sheet1
Mock	ZIKV
1.12	4.68
0.95	3.22
0.97	6.73
1.56	8.16
1.38	7.51
0.79	6.35
		50
		50
		50
		50
		50
		50
		50
		50
		50
		50
			50
