# Supplementary material for: Zika virus causes placental pyroptosis and associated adverse fetal outcomes by activating GSDME
Source: eLife journal article supplement (doi:10.7554/elife.73792), 2022-07-27
Supplement: fig6-data1 [file Fig 6B.xlsx]

## Sheet: Sheet1
Mock	ZIKV
3.16	8.5
3.92	6.44
2.26	8.34
4.48	8.21
3.48	8.07
3.08	4.17
		50
		50
		50
		50
		50
		50
		50
		50
		50
		50
			50
