# Supplementary material for: Zika virus causes placental pyroptosis and associated adverse fetal outcomes by activating GSDME
Source: eLife journal article supplement (doi:10.7554/elife.73792), 2022-07-27
Supplement: fig6-data1 [file Fig 6G.xlsx]

## Sheet: Sheet1
Vehicle	Vehicle+ZIKV	R-7050+ZIKV
0.86	5.59	0.6
1.02	10.33	1.61
2.15	7.64	1.58
