# Supplementary material for: Zika virus causes placental pyroptosis and associated adverse fetal outcomes by activating GSDME
Source: eLife. 2022 Aug 16;11:e73792. doi: 10.7554/eLife.73792 (PMC9381041; doi:10.7554/eLife.73792)
Supplement: Figure 1—figure supplement 1—source data 1. [file elife-73792-fig1-figsupp1-data1.xlsx]

## Sheet: Sheet1
	WT			GSDME-/-			GFP			hGSDME
12h	350	200	400	400	400	450	350	600	400	300	450	400
24h	5500	7500	7000	9000	7000	8000	9500	11000	8000	4500	3000	3200
36h	55000	45000	50000	80000	90000	80000	50000	105000	90000	75000	50000	60000
48h	4500000	3500000	3800000	6000000	4500000	4800000	5000000	3500000	3500000	3500000	4000000	4000000
60h	9000000	10000000	9800000	16000000	14000000	9200000	4500000	3500000	6000000	6500000	6000000	4800000
72h	8500000	9000000	10000000	20000000	40000000	10000000	10000000	8000000	8000000	20000000	20000000	15000000
