# Supplementary material for: Zika virus causes placental pyroptosis and associated adverse fetal outcomes by activating GSDME
Source: eLife. 2022 Aug 16;11:e73792. doi: 10.7554/eLife.73792 (PMC9381041; doi:10.7554/eLife.73792)
Supplement: Figure 6—figure supplement 1—source data 1. [file elife-73792-fig6-figsupp1-data1.xlsx]

## Sheet: Sheet1
Vehicle	Vehicle+ZIKV	R-7050+ZIKV
0.85	0	0.8
0.85	0	0.82
0.9	0	0.83
0.79	0	0.92
0.86	0	0.82
0.87	0	1.02
0.88	0	1.05
0.91	0	0.86
0.92	0	0.94
1.05	0	0.95
0.89	0	1.03
0.88	0	0.78
0.95	0	0.79
1.02	0	0.86
0.92	0	0.79
0.92	0	0.92
0.93	0	0.79
0.92	0	0.86
0.9	0	0.81
0.89	0	0.85
0.89	0.78	0.83
0.91	0.9	0.84
0.91	0.89	0.87
0.87	0.2	0.92
0.88	0.78	0.94
0.8	0.9	0.95
0.75	0.82	0.99
0.76	0.92	0.92
0.81	0.85	0.93
0.8	0.86	0.89
0.82	1	0.9
1.01	0.99	0.88
0.9	0.91	0.86
0.9	0.92	0.76
0.88	0.95	0.85
0.81	0.85	0.79
0.92	0.59	0.82
0.91	0.54	0.92
0.9	0.6	0.91
0.86		0.83
0		0.61
		0.58
		0.45
		0.49
		0.62
		0.5
		0
